# Supplementary material for: Engineered Biological Neural Networks on High Density CMOS Microelectrode Arrays
Source: Frontiers journal article supplement (doi:10.3389/fnins.2022.829884), 2022-02-21
Supplement: Data_Sheet_3.PDF [file Data_Sheet_3.PDF]

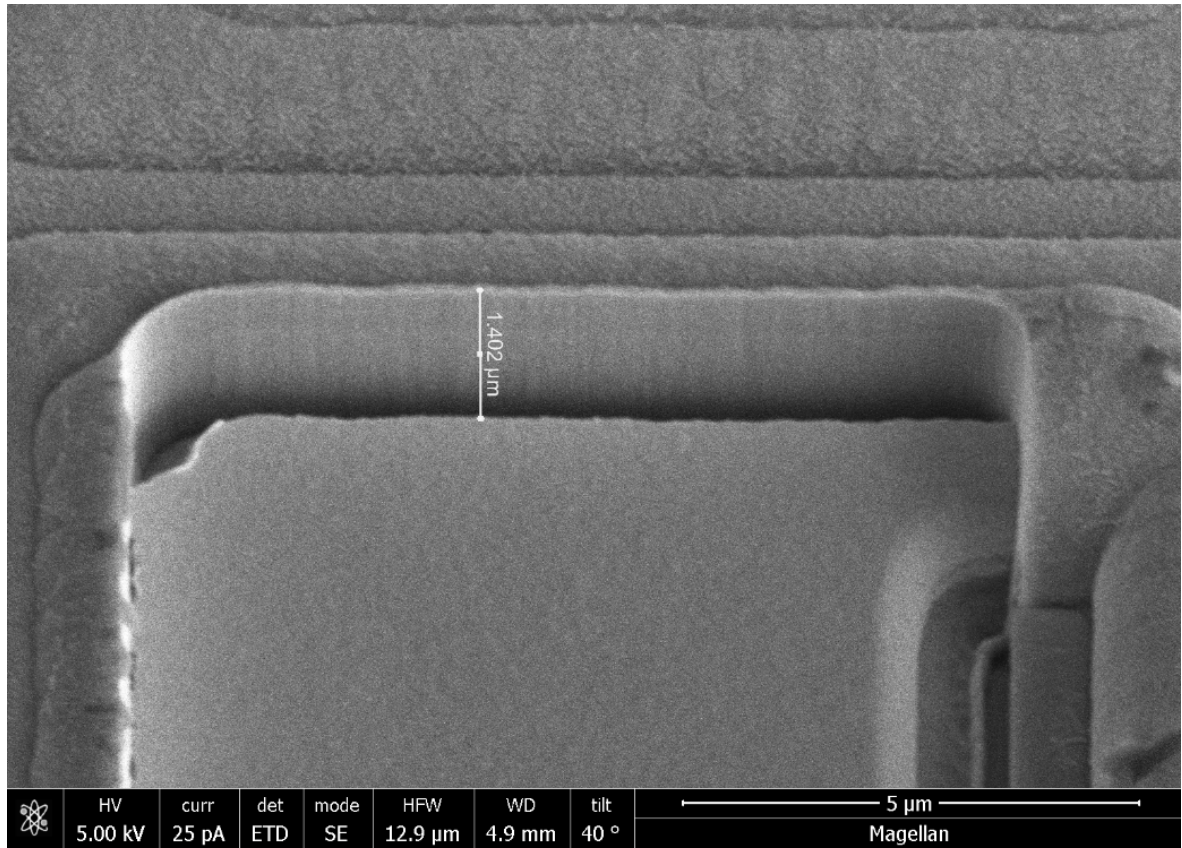

SEM image of a recessed electrode on the CMOS chip surface with indicated projected feature height  $h$ .

The figure above shows a measurement of the surface height of the CMOS chip. The height  $h$  was determined by acquiring an image under an angle of  $\alpha = 40^\circ$ . The true height  $h_t$  of the well was calculated in the following way:

$$h_t = \frac{h}{\sin(\alpha)} = \frac{1.402 \mu\text{m}}{\sin(40^\circ)} = 2.18 \mu\text{m} \quad (1)$$
